# Supplementary material for: Computational Analysis of the Predicted Evolutionary Conservation of Human Phosphorylation Sites
Source: PubMed Central journal article supplement (PMC4821552; doi:10.1371/journal.pone.0152809), 2016-04-05

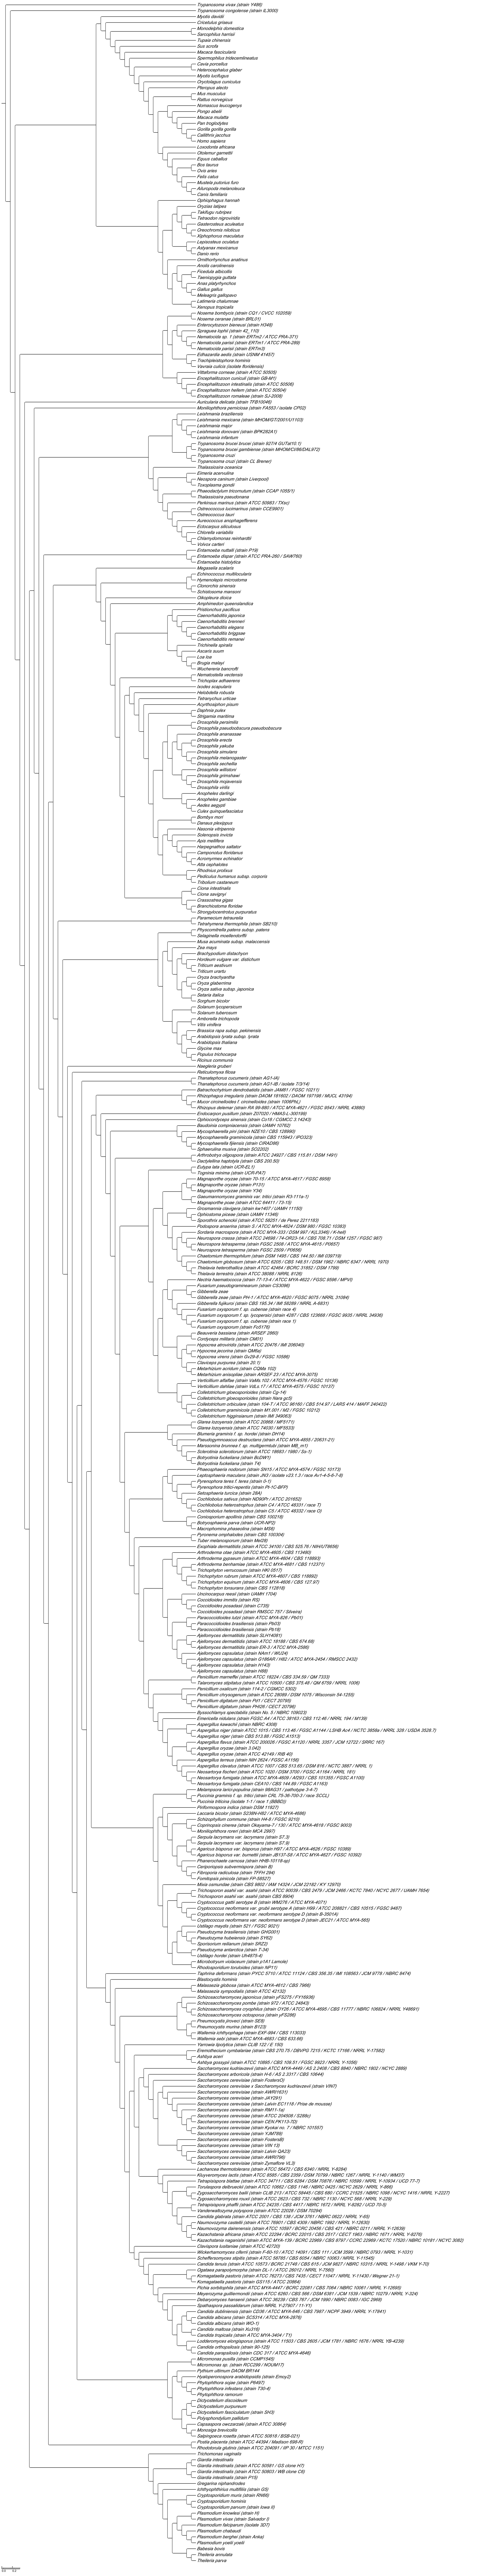

Supplement: pone.0152809.s009.pdf [file pone.0152809.s009.pdf]
